# Supplementary material for: Senescent neutrophils-derived exosomal piRNA-17560 promotes chemoresistance and EMT of breast cancer via FTO-mediated m6A demethylation
Source: PubMed Central journal article supplement (PMC9613690; doi:10.1038/s41419-022-05317-3), 2022-10-27
Supplement: 41419_2022_5317_MOESM12_ESM.pdf [file 41419_2022_5317_MOESM12_ESM.pdf]

Please complete the table below to indicate the contributions of all named authors to the figures.

Figure 1:

|  |
|--|
|  |
|--|

Figure 2:

|  |
|--|
|  |
|--|

Figure 3:

|  |
|--|
|  |
|--|

Figure 4:

|  |
|--|
|  |
|--|

Figure 5:

|  |
|--|
|  |
|--|

Figure 6:

|  |
|--|
|  |
|--|

Signed for and on behalf of the Author(s):

*Baochi Du*

Print Name:

|  |
|--|
|  |
|--|

Date:

|  |
|--|
|  |
|--|
